# Supplementary material
Source: bioRxiv or medRxiv preprint supplement (http://www.medrxiv.org/highwire/filestream/72538/field_highwire_adjunct_files/7/2020.02.23.20027029-5.pdf)
Supplement: Supplementary file [file 2020.02.23.20027029-5.pdf]

| patientID | Group       | SBP_ABPM_24h_Resp |
|-----------|-------------|-------------------|
| 1         | Fasting arm | non-R             |
| 2         | Fasting arm | R                 |
| 3         | Fasting arm | R                 |
| 4         | DASH arm    | R                 |
| 5         | DASH arm    | non-R             |
| 7         | DASH arm    | non-R             |
| 8         | DASH arm    | non-R             |
| 9         | DASH arm    | not-determinable  |
| 11        | DASH arm    | R                 |
| 12        | Fasting arm | non-R             |
| 13        | Fasting arm | R                 |
| 14        | DASH arm    | R                 |
| 15        | DASH arm    | R                 |
| 16        | Fasting arm | R                 |
| 17        | Fasting arm | non-R             |
| 18        | DASH arm    | R                 |
| 19        | DASH arm    | R                 |
| 20        | DASH arm    | non-R             |
| 21        | Fasting arm | R                 |
| 22        | Fasting arm | non-R             |
| 23        | DASH arm    | not-determinable  |
| 24        | Fasting arm | R                 |
| 25        | DASH arm    | R                 |
| 26        | Fasting arm | R                 |
| 27        | DASH arm    | R                 |
| 28        | Fasting arm | R                 |
| 29        | DASH arm    | non-R             |
| 30        | Fasting arm | R                 |
| 31        | DASH arm    | non-R             |
| 32        | DASH arm    | R                 |
| 33        | Fasting arm | R                 |
| 34        | Fasting arm | not-determinable  |
| 35        | Fasting arm | R                 |
| 36        | DASH arm    | non-R             |
| 37        | Fasting arm | R                 |
| 38        | DASH arm    | non-R             |
| 39        | Fasting arm | non-R             |
| 40        | DASH arm    | R                 |
| 41        | DASH arm    | R                 |
| 42        | DASH arm    | R                 |
| 43        | Fasting arm | R                 |
| 44        | DASH arm    | non-R             |
| 45        | Fasting arm | R                 |
| 46        | Fasting arm | non-R             |
| 47        | Fasting arm | R                 |
| 48        | DASH arm    | R                 |
| 49        | Fasting arm | non-R             |
| 50        | Fasting arm | R                 |
| 51        | DASH arm    | not-determinable  |
| 52        | Fasting arm | R                 |
| 53        | DASH arm    | non-R             |
| 54        | DASH arm    | non-R             |
| 55        | Fasting arm | non-R             |
| 56        | DASH arm    | R                 |
| 57        | DASH arm    | non-R             |
| 58        | Fasting arm | R                 |
| 59        | Fasting arm | not-determinable  |
| 60        | DASH arm    | R                 |
| 61        | Fasting arm | R                 |
| 62        | Fasting arm | R                 |
| 63        | DASH arm    | non-R             |
| 64        | Fasting arm | R                 |
| 65        | Fasting arm | non-R             |
| 66        | DASH arm    | R                 |
| 67        | Fasting arm | R                 |
| 68        | Fasting arm | R                 |
| 69        | DASH arm    | R                 |
| 70        | DASH arm    | R                 |
| 72        | DASH arm    | R                 |
| 73        | DASH arm    | non-R             |
| 74        | Fasting arm | non-R             |

|                  |                |
|------------------|----------------|
| non-R            | =non-responder |
| R                | =responder     |
| not-determinable |                |
